# Supplementary material
Source: publisher figshare collection journal article supplement (https://karger.figshare.com/ndownloader/files/22108248)
Supplement: Supplementary file 1 [file 22108248]

**Supplemental table 2.** Comparison of five subscores of the Revised Version of the Ability for Basic Movement Scale score between the independent and dependent gait groups on 90 days from admission

|  | Independent at 90 day | Dependent at 90 day | Univariate analysis |
| --- | --- | --- | --- |
| Factors | n=14 | n=16 | p value |
| turning over from the supine position | 5 (3,6) | 2 (1,5) | <0.001 |
| sitting up | 3 (2,5) | 2 (1,3) | <0.001 |
| remaining in sitting position | 4 (1,6) | 2 (1,4) | 0.003 |
| standing up | 3 (1,4) | 2 (1,2) | <0.001 |
| remaining in standing position | 3 (1,5) | 2 (1,3) | <0.001 |
